# Supplementary material for: Possible Mechanisms of Resistance Development to Photodynamic Therapy (PDT) In Vulvar Cancer Cells
Source: MDPI journal article supplement (doi:10.3390/ijms232314689), 2022-11-24
Supplement: s1 [file s1]

# Possible Mechanisms of Resistance Development to Photodynamic Therapy (PDT) In Vulvar Cancer Cells

Beata Joanna Mossakowska <sup>1,\*</sup>, Anna Fabisiewicz <sup>1</sup>, Barbara Tudek <sup>2,3,†</sup>  
and Janusz Aleksander Siedlecki <sup>1</sup>

<sup>1</sup> Department of Molecular and Translational Oncology, Maria Skłodowska-Curie National Research Institute of Oncology, 02-781 Warsaw, Poland

<sup>2</sup> Faculty of Biology, Institute of Genetics and Biotechnology, University of Warsaw, 02-106 Warsaw, Poland

<sup>3</sup> Institute of Biochemistry and Biophysics, Polish Academy of Sciences, 02-106 Warsaw, Poland

\* Correspondence: beata.mossakowska@pib-nio.pl

† Deceased.

## SUPPLEMENTARY MATERIALS

### **Proteome comparison of PDT resistant cell lines to their parental lines**

Despite the large differences between the two PDT-resistant vulvar cancer cell lines, they also showed some common features. Both lines had elevated levels of LASP1, ATIC, ST13, CDV3 proteins, and decreased HM13 proteins. These changes may be involved in the development of resistance to PDT.

LASP1, the actin-binding cytoskeleton protein, which localizes in cellular protrusions dedicated to migration and predominantly is involved in the reorganization of cytoskeleton during cellular motility. In focal adhesions (FA), it regulates anchoring to the ECM [1] and probably participates in mediating survival signals from these structures [2]. LASP1 plays a role in vesicle secretion, matrix metalloproteinase expression, transcription regulation, and activation of survival and proliferation pathways in different types of cancer. It may influence the expression of AP-1 dependent genes and positively regulate the PI3K/AKT pathway. Furthermore, after serine 146, LASP1 can be translocated along with ZO-2 to the cell nucleus, where it contributes to SNAIL-dependent epigenetic silencing of E-cadherin expression. Additionally, LASP-1 influence on the expression of several others proteins [2] and the activity of signaling pathways may suggest its function in EMT. In colorectal cancer cells, LASP1 led to EMT by activation of MAPK, PI3K/AKT and Smad. In contrast, in non-small cell lung cancer, LASP1 promoted proliferation and invasion through FAK-AKT regulation [3]. Due to the possible role of LASP1 in promoting cell survival and/or EMT, this protein could be a potential target for combined therapy with PDT.

ATIC is an enzyme involved in de novo purine biosynthesis pathway. The appropriate level of purines in mammalian cells is maintained by the coordinated action of their de novo biosynthetic and recovery pathways. Normal cells appear to preferentially use recovery for purine synthesis, while cancer cells prefer the de novo pathway to support increased RNA production and DNA replication. Inhibition of ATIC may impair cell proliferation and migration and lead to apoptosis [4]. Thus, inhibition of ATIC could positively influence the efficacy of PDT, and the differences in purine metabolism between healthy and neoplastic cells could ensure lack of increase in toxicity of such therapy.

ST13 is the co-chaperone of HSP70 family proteins. This protein supports the chaperone function of HSP70 in both protein folding and repair process and in controlling the activity of regulatory proteins

such as steroid receptors and regulators of proliferation or apoptosis [5]. Therefore, along with HSP70, it may probably contribute to the reduction in the PDT effect.

CDV3 is a protein of unknown function, that likely plays a role in cell proliferation [6]. CDV3 is also correlated with tumorigenesis and may affect some biological processes in cancer [7].

HM13 is involved in the formation of HLA-E surface epitopes from MHC-I signal peptides. HLA-E expression on the surface of tumor cells can lead to immunosuppression [8].

Both cell lines could also activate the PI3K/AKT, MEK/ERK, NF- $\kappa$ B or STAT3 pathways. In resistant CAL-39 cells, among others, increased receptors may be responsible for their activation [9-16]. In resistant A-431 cells, an increased amount of the AXL receptor may lead to activation of the above-mentioned pathways [17].

*Changes in the level of proteins involved in formation and regulation of cytoskeleton*

**Table S1.** Changes in the level of proteins involved in formation and regulation of cytoskeleton in resistant CAL-39 cells.

|                                                                   |         | Gen         | T-Test    | CR:CS      |
|-------------------------------------------------------------------|---------|-------------|-----------|------------|
| Regulation of actin polymerization and organization               |         | CAPG        | 0,04      | Only in CR |
|                                                                   |         | TPM1        | 0,04      | Only in CR |
|                                                                   |         | TPM3        | 0,0011    | Only in CR |
|                                                                   |         | ZNF185      | 0,0094    | 100        |
|                                                                   |         | TAGLN2      | 0,00058   | 86         |
|                                                                   |         | TPM3        | 0,016     | 36         |
|                                                                   |         | COTL1       | 0,0022    | 30         |
|                                                                   |         | SEPT2       | 0,0098    | 32         |
|                                                                   |         | FLNA        | 0,00017   | 17         |
|                                                                   |         | LASP1       | 0,00045   | 14         |
|                                                                   |         | TMSB4X      | 0,021     | 10         |
|                                                                   |         | PFN1        | 0,00016   | 6          |
|                                                                   |         | ARPC4-TTLL3 | 0,0084    | 5,7        |
|                                                                   |         | CTTN        | 0,03      | 5,5        |
|                                                                   |         | MSN         | 0,00018   | 4,2        |
|                                                                   |         | EZR         | 0,018     | 2,8        |
|                                                                   |         | ACTN1       | 0,012     | 2,6        |
|                                                                   |         | CAPZA1      | 0,0039    | 4,4        |
|                                                                   |         | SPTBN1      | 0,02      | 2,2        |
|                                                                   |         | SPTAN1      | 0,037     | 1,7        |
|                                                                   |         | CORO1C      | 0,0013    | 0,1        |
|                                                                   |         | EPB41L1     | 0,044     | Only in CS |
|                                                                   |         | INF2        | 0,0045    | Only in CS |
| Myosin                                                            |         | MYH10       | 0,0095    | Only in CR |
|                                                                   |         | MYO1C       | 0,03      | 69         |
|                                                                   |         | MYH9        | 0,01      | 9,6        |
|                                                                   |         | MYL12A      | 0,034     | 8,8        |
|                                                                   |         | MYL6        | 0,011     | 6          |
| Tubulins subunits                                                 |         | TUBB6       | 0,00036   | 16         |
|                                                                   |         | TUBB        | 0,0024    | 3          |
|                                                                   |         | TUBA1C      | 0,0022    | 2,7        |
|                                                                   |         | TUBB4B      | 0,013     | 2,4        |
| Regulation of the MT cytoskeleton polymerization and organization |         | STMN1       | 0,042     | Only in CR |
|                                                                   |         | TTLL12      | 0,014     | Only in CR |
|                                                                   |         | SEPT2       | 0,0098    | 32         |
|                                                                   |         | MAPRE1      | 0,017     | 8,6        |
|                                                                   |         | TPT1        | 0,034     | 2,2        |
|                                                                   |         | CORO1C      | 0,0013    | 0,1        |
| Collagen biosynthesis                                             |         | PLOD1       | 0,02      | 6,6        |
|                                                                   |         | COLGALT1    | 0,005     | 5,8        |
| Keratins                                                          | Type II | KRT81       | 0,044     | Only in CR |
|                                                                   |         | KRT8        | 0,039     | 0,6        |
|                                                                   |         | KRT5        | 0,001     | Only in CS |
|                                                                   |         | KRT6A       | 0,0019    | Only in CS |
|                                                                   | Type I  | KRT17       | 0,029     | 0,5        |
|                                                                   |         | KRT19       | 0,0026    | 0,1        |
|                                                                   |         | KRT13       | 0,0064    | 0,007      |
|                                                                   |         | KRT15       | < 0,00010 | Only in CS |
|                                                                   |         | KRT14       | 0,00044   | Only in CS |
|                                                                   |         |             |           |            |

|                                            |        |           |            |
|--------------------------------------------|--------|-----------|------------|
|                                            | KRT16  | 0,0012    | Only in CS |
| <b>Keratin organization</b>                | EPPK1  | 0,0024    | 0,2        |
| <b>E-cadherin/catenin complex</b>          | CTNNB1 | 0,024     | 0,1        |
|                                            | CTNNA1 | < 0,00010 | 0,07       |
|                                            | CTNND1 | 0,00067   | 0,04       |
|                                            | CDH1   | 0,0025    | Only in CS |
| <b>Desmosomal proteins</b>                 | JUP    | 0,037     | 0,07       |
|                                            | DSG2   | 0,026     | 0,06       |
|                                            | DSP    | 0,00096   | 0,02       |
|                                            | DSG3   | < 0,00010 | Only in CS |
|                                            | PPL    | 0,026     | Only in CS |
|                                            | PKP3   | 0,0022    | Only in CS |
|                                            | PKP1   | 0,0061    | Only in CS |
| <b>Proteins that form hemidesmosomes</b>   | PLEC   | 0,0019    | 0,09       |
|                                            | ITGB4  | 0,0012    | 0,02       |
|                                            | ITGA6  | 0,0011    | Only in CS |
|                                            | LAMA3  | < 0,00010 | Only in CS |
|                                            | LAMB3  | 0,0048    | Only in CS |
| <b>Other proteins involved in adhesion</b> | PPFIA1 | 0,0001    | Only in CR |
|                                            | VCL    | 0,033     | 92         |
|                                            | TJP2   | 0,0025    | 3,5        |
|                                            | VMP1   | 0,045     | 0,3        |
|                                            | SDC1   | 0,0075    | 0,1        |
|                                            | BCAM   | 0,0048    | Only in CS |
|                                            | THBS1  | 0,017     | Only in CS |

**Table S2.** Changes in the level of proteins involved in formation and regulation of cytoskeleton in resistant A-431 cells.

|                                                            | Gen            | T-Test    | AR:AS      |
|------------------------------------------------------------|----------------|-----------|------------|
| <b>Regulation of actin polymerization and organization</b> | ARPC3          | 0,036     | Only in AR |
|                                                            | SEPT9          | 0,041     | 5,4        |
|                                                            | LASP1          | 0,0087    | 4,1        |
|                                                            | TPM1           | 0,041     | 3,9        |
|                                                            | LCP1           | 0,035     | 2,1        |
|                                                            | ARPC4-TTL3     | 0,034     | 0,3        |
|                                                            | TES            | 0,00048   | Only in AS |
|                                                            | DSTN           | 0,047     | Only in AS |
| <b>Tubulin</b>                                             | TUBA4A         | < 0,00010 | Only in AR |
| <b>Tight junction (TJ)</b>                                 | CGN            | 0,00049   | Only in AR |
| <b>Keratins</b>                                            | <b>Type I</b>  | KRT18     | 0,045      |
|                                                            |                | KRT13     | 0,044      |
|                                                            | <b>Type II</b> | KRT8      | 0,018      |
|                                                            |                | KRT1      | 0,0071     |
|                                                            |                | KRT5      | 0,0049     |

*Changes in the level of proteins associated with metabolic processes*

**Table S3.** Changes in the level of proteins associated with metabolic processes in resistant CAL-39 cells.

|                                           | Gen    | T-Test    | CR:CS |
|-------------------------------------------|--------|-----------|-------|
| <b>Glucose transporter</b>                | SLC2A1 | 0,013     | 0,08  |
| <b>Glycolysis and pyruvate metabolism</b> | PGAM1  | < 0,00010 | 16    |
|                                           | GLO1   | 0,0041    | 11    |
|                                           | PGK1   | 0,0018    | 5     |
|                                           | GPI    | 0,035     | 5     |

|                                          |                                      |           |           |            |
|------------------------------------------|--------------------------------------|-----------|-----------|------------|
|                                          |                                      | TPI1      | 0,0054    | 4,8        |
|                                          |                                      | LDHA      | 0,0016    | 4,4        |
|                                          |                                      | ENO1      | 0,002     | 2,5        |
|                                          |                                      | LDHB      | 0,0025    | 2,3        |
| Tricarboxylic acid) cycle<br>(TCA) cycle |                                      | IDH2      | 0,012     | 15         |
|                                          |                                      | MDH2      | 0,00086   | 0,4        |
|                                          |                                      | CS        | 0,045     | 0,4        |
|                                          |                                      | OGDH      | 0,029     | 0,1        |
| Oxidative phosphorylation                | Complex V                            | ATP5H     | 0,023     | 0,5        |
|                                          |                                      | ATP5F1A   | 0,0083    | 0,4        |
|                                          |                                      | ATP5O     | 0,0075    | 0,2        |
|                                          | Complex IV                           | COX7A2L   | 0,049     | 0,4        |
|                                          |                                      | COX5A     | 0,043     | 0,2        |
|                                          | Complex III                          | UQCRC2    | 0,017     | 0,1        |
|                                          |                                      | UQCRFS1   | < 0,00010 | Only in CS |
|                                          | Complex I                            | NDUFS1    | 0,026     | 0,04       |
|                                          |                                      | NDUFA13   | 0,0028    | 0,01       |
|                                          |                                      | NDUFS4    | 0,0051    | Only in CS |
| Nucleotide synthesis<br>nukleotydy       | Folic acid cycle                     | MTHFD1    | 0,0021    | Only in CR |
|                                          |                                      | MTHFD2    | 0,00039   | Only in CS |
|                                          | Purine synthesis                     | NUDT5     | 0,015     | Only in CR |
|                                          |                                      | IMPDH2    | 0,002     | Only in CR |
|                                          |                                      | GMPS      | 0,038     | 100        |
|                                          |                                      | ATIC      | 0,0088    | 22         |
|                                          | Synthesis of purines and pyrimidines | NME1      | 0,023     | 5,1        |
|                                          |                                      | NME1-NME2 | 0,026     | 2          |
| Heme metabolism                          |                                      | CPOX      | 0,012     | 14         |
| Glycogenolysis                           |                                      | PYGL      | 0,00045   | Only in CR |
| Pentose Phosphate Pathway                |                                      | G6PD      | 0,00059   | 0,2        |
|                                          |                                      | PGD       | 0,012     | 0,05       |
| S-Adenosyl methionine (SAM) metabolism   |                                      | MTAP      | 0,041     | Only in CR |
|                                          |                                      | AHCY      | 0,0076    | 17         |
|                                          |                                      | PCMT1     | 0,0031    | 9,5        |
| Amino acid synthesis                     |                                      | PSAT1     | 0,017     | Only in CR |
|                                          |                                      | IDH2      | 0,012     | 15         |
|                                          |                                      | ASNS      | 0,0021    | 12         |
|                                          |                                      | MDH1      | 0,021     | 8,9        |
|                                          |                                      | OAT       | 0,021     | 4,4        |
|                                          |                                      | PHGDH     | 0,017     | 4,3        |
|                                          |                                      | GOT2      | 0,028     | 0,5        |
| β-oxidation of fatty acids               |                                      | ACADVL    | 0,015     | 2,8        |
|                                          |                                      | ACAD9     | 0,021     | 0,3        |
|                                          |                                      | ACSL3     | 0,018     | 0,1        |
|                                          |                                      | HSD17B4   | 0,017     | 0,3        |
|                                          |                                      | SCP2      | 0,0027    | 0,2        |
| Steroid metabolism                       |                                      | CYB5R3    | < 0,00010 | 4,4        |
|                                          |                                      | HINT2     | 0,00094   | 0,2        |
|                                          |                                      | AKR1D1    | 0,0022    | Only in CS |
|                                          |                                      | AKR1C2    | 0,022     | Only in CS |
| Mitochondrial transporters               | Pi/H+                                | SLC25A5   | 0,029     | 0,6        |
|                                          | ADP/ATP                              | SLC25A3   | 0,011     | 0,3        |

**Table S4.** Changes in the level of proteins associated with metabolic processes in resistant A-431 cells.

|                                           | Gen    | T-Test    | AR:AS      |
|-------------------------------------------|--------|-----------|------------|
| Regulation of acetyl-CoA biosynthesis     | PDP1   | < 0,00010 | Only in AR |
| TCA cycle                                 | SUCLG2 | 0,014     | Only in AR |
|                                           | DLD    | 0,027     | 1,6        |
|                                           | IDH3B  | 0,043     | 0,3        |
| Respiratory chain (ATP synthases)         | ATP5J  | 0,042     | 7,8        |
|                                           | ATP5O  | 0,027     | 1,9        |
| Nucleotide synthesis                      | ATIC   | 0,021     | 5,2        |
|                                           | AK4    | 0,0014    | 0,3        |
| Lipid metabolism, PpIX and heme transport | TSPO   | 0,047     | 0,3        |
| Metabolism of ketone bodies               | OXCT1  | 0,04      | 0,3        |

### *Changes in the level of proteins involved in cellular signaling*

**Table S5.** Changes in the level of proteins involved in cellular signaling in resistant CAL-39 cells.

|                                               | Gen     | T-Test    | CR:CS      |
|-----------------------------------------------|---------|-----------|------------|
| Factors involved in transcription regulation  | STAT3   | 0,0019    | Only in CR |
|                                               | NUCKS1  | 0,017     | Only in CR |
|                                               | HDGF    | 0,0013    | 15         |
|                                               | RELA    | 0,03      | 5,2        |
|                                               | NCOA5   | 0,036     | Only in CS |
| Receptors and membrane proteins               | EGFR    | 0,0031    | Only in CR |
|                                               | LANCL2  | 0,031     | Only in CR |
|                                               | CD99    | 0,04      | Only in CR |
|                                               | HLA-B   | 0,0042    | Only in CR |
|                                               | HLA-A   | 0,033     | 15         |
|                                               | GPRC5A  | 0,034     | 4          |
|                                               | CD44    | 0,046     | 2,5        |
|                                               | CKAP4   | 0,042     | 0,4        |
|                                               | TACSTD2 | 0,0042    | 0,09       |
| Kinases                                       | PRKCI   | 0,0031    | Only in CR |
|                                               | MAP2K2  | 0,00061   | 23         |
| Phosphatases                                  | PPM1G   | 0,01      | Only in CR |
|                                               | PPP2CB  | < 0,00010 | Only in CR |
|                                               | PPP2R1A | 0,0016    | 6,1        |
| Galectins                                     | LGALS3  | 0,033     | 16         |
|                                               | LGALS1  | 0,0043    | 5,7        |
| G proteins                                    | GNAS    | 0,031     | Only in CS |
| Caveolae forming proteins                     | CAVIN3  | 0,0002    | 50         |
|                                               | CAV1    | 0,00079   | 0,2        |
| S100A proteins                                | S100A6  | 0,0018    | 6,9        |
|                                               | S100A14 | 0,018     | Only in CS |
| Other proteins involved in cellular signaling | CLIC1   | 0,0051    | Only in CR |
|                                               | FUT8    | 0,027     | Only in CR |
|                                               | CDV3    | 0,0087    | 20         |
|                                               | PEBP1   | 0,0011    | 11         |
|                                               | MIF     | 0,00071   | 6,1        |
|                                               | MYOF    | 0,011     | 2          |
|                                               | YWHAE   | 0,031     | 1,7        |

**Table S6.** Changes in the level of proteins involved in cellular signaling in resistant A-431 cells.

|                                        | Gen     | T-Test  | AR:AS      |
|----------------------------------------|---------|---------|------------|
| <b>Transcription factors</b>           | PHF3    | 0,02    | Only in AR |
| <b>Receptors</b>                       | AXL     | 0,0041  | Only in AR |
|                                        | EGFR    | 0,023   | 0,5        |
|                                        | PTPRF   | 0,022   | 0,09       |
| <b>Kinases</b>                         | MAP4K4  | 0,036   | Only in AS |
|                                        | CSNK2A3 | 0,024   | Only in AS |
| <b>G proteins</b>                      | GNAI3   | 0,033   | Only in AS |
|                                        | GNA11   | 0,037   | Only in AS |
| <b>Ca<sup>2+</sup> binding protein</b> | CALB2   | 0,00083 | Only in AS |
| <b>NF-κB regulation, UPR</b>           | DDRGK1  | 0,041   | Only in AS |
| <b>Proliferation?</b>                  | CDV3    | 0,015   | 5          |

*Changes in the level of proteins involved in chromatin regulation*

**Table S7.** Changes in the level of proteins involved in chromatin regulation in resistant CAL-39 cells.

|                               | Gen                                                        | T-Test   | CR:CS   |
|-------------------------------|------------------------------------------------------------|----------|---------|
| <b>Chromatin organization</b> | <b>Histones</b>                                            | HIST1H1C | 0,0068  |
|                               |                                                            | HIST1H1E | 0,0068  |
|                               |                                                            | HIST1H1D | 0,00023 |
|                               | <b>Histone binding and/or modification</b>                 | TTL12    | 0,014   |
|                               |                                                            | PTMA     | 0,0092  |
|                               |                                                            | DEK      | 0,041   |
|                               |                                                            | CHTOP    | 0,00023 |
|                               |                                                            | FBLL1    | 0,02    |
|                               |                                                            | FBL      | 0,0042  |
|                               | <b>Chromatin-associated non-histone proteins</b>           | HMGB2    | 0,0059  |
|                               |                                                            | HMGB1    | 0,023   |
|                               | <b>Nuclear import of histones and chromatin assembly</b>   | NASP     | 0,00031 |
|                               |                                                            | NAP1L1   | 0,029   |
|                               | <b>Decompaction of chromatin in response to DNA damage</b> | PARP1    | 0,012   |
|                               | <b>Component of DNA helicase</b>                           | MCM2     | 0,042   |
|                               | <b>Nuclear assembly</b>                                    | TMPO     | 0,0015  |
|                               |                                                            | BANF1    | 0,013   |

**Table S8.** Changes in the level of proteins involved in chromatin regulation in resistant A-431 cells.

|                               | Gen                         | T-Test   | AR:AS |
|-------------------------------|-----------------------------|----------|-------|
| <b>Chromatin organization</b> | <b>Histones</b>             | HIST1H1D | 0,003 |
|                               | <b>DNA helicase</b>         | RUVBL2   | 0,038 |
|                               |                             | RUVBL2   | 0,038 |
|                               | <b>Histone modification</b> | PA2G4    | 0,039 |
|                               |                             | TRIM28   | 0,047 |
|                               |                             | HAT1     | 0,02  |
|                               | <b>Chromatin silencing</b>  | UTP3     | 0,02  |
|                               |                             |          | 0,06  |

*Changes in the level of proteins involved in cell cycle*

**Table S9.** Changes in the level of proteins involved in cell cycle in resistant CAL-39 cells.

|            |                                    | Gen     | T-Test  | CR:CS      |
|------------|------------------------------------|---------|---------|------------|
| Cell cycle | Replication                        | NASP    | 0,00031 | 13         |
|            |                                    | MCM2    | 0,042   | 3,5        |
|            |                                    | NAP1L1  | 0,029   | 2          |
|            | Centrosome duplication             | CHORDC1 | 0,013   | Only in CR |
|            | Centrosome cohesion before mitosis | CROCC   | 0,033   | 5          |
|            | Mitosis                            | NUDC    | 0,00042 | Only in CR |
|            |                                    | SEPT2   | 0,0098  | 32         |
|            |                                    | CLTA    | 0,008   | 9          |
|            |                                    | NUMA1   | 0,0026  | 0,04       |
|            | Cytokinesis                        | NUDC    | 0,00042 | Only in CR |
|            |                                    | PDCD6IP | 0,014   | Only in CR |
|            |                                    | SEPT2   | 0,0098  | 32         |
|            |                                    | CHMP4B  | 0,014   | 8,8        |

**Table S10.** Changes in the level of proteins involved in cell cycle in resistant A-431 cells.

|            |                                    | Gen   | T-Test | AR:AS |
|------------|------------------------------------|-------|--------|-------|
| Cell cycle | Replication                        | MCM3  | 0,033  | 2     |
|            | Centrosome cohesion before mitosis | CROCC | 0,016  | 2     |
|            | Cytokinesis                        | SEPT9 | 0,041  | 5,4   |

*Changes in the level of proteins that may be involved in immunogenic cell death*

**Table S11.** Changes in the level of proteins that may be involved in immunogenic cell death in resistant CAL-39 cells.

|                                |       | Gen       | T-Test  | CR:CS      |
|--------------------------------|-------|-----------|---------|------------|
| MHC class I                    |       | HLA-B     | 0,0042  | Only in CR |
|                                |       | HLA-A     | 0,033   | 15         |
| Escape from immune response    |       | LGALS3    | 0,033   | 16         |
|                                |       | LGALS1    | 0,0043  | 5,7        |
|                                |       | MIF       | 0,00071 | 6,1        |
| Proteins that may act as DAMPS | HSP70 | HSPA2     | 0,017   | 5          |
|                                |       | HMGB1     | 0,012   | 4,5        |
|                                | HSP90 | HSP90AB2P | 0,025   | 2,7        |
|                                |       | HSP90AB1  | 0,011   | 2,2        |
|                                |       | HSP90AA1  | 0,032   | 1,9        |
|                                |       | CALR      | 0,016   | 1,9        |
|                                |       |           |         |            |
| TF involved in immune response |       | STAT3     | 0,0019  | Only in CR |
|                                |       | RELA      | 0,03    | 5,2        |
| Antigen processing             |       | ERAP1     | 0,0058  | 0,1        |
|                                |       | HM13      | 0,0083  | 0,02       |

**Table S12.** Changes in the level of proteins involved in antigen processing in resistant A-431 cells.

|                    | Gen  | T-Test | AR:AS |
|--------------------|------|--------|-------|
| Antigen processing | TAP1 | 0,032  | 0,3   |



|  |       |        |      |
|--|-------|--------|------|
|  | TAPBP | 0,0011 | 0,08 |
|  | HM13  | 0,035  | 0,2  |

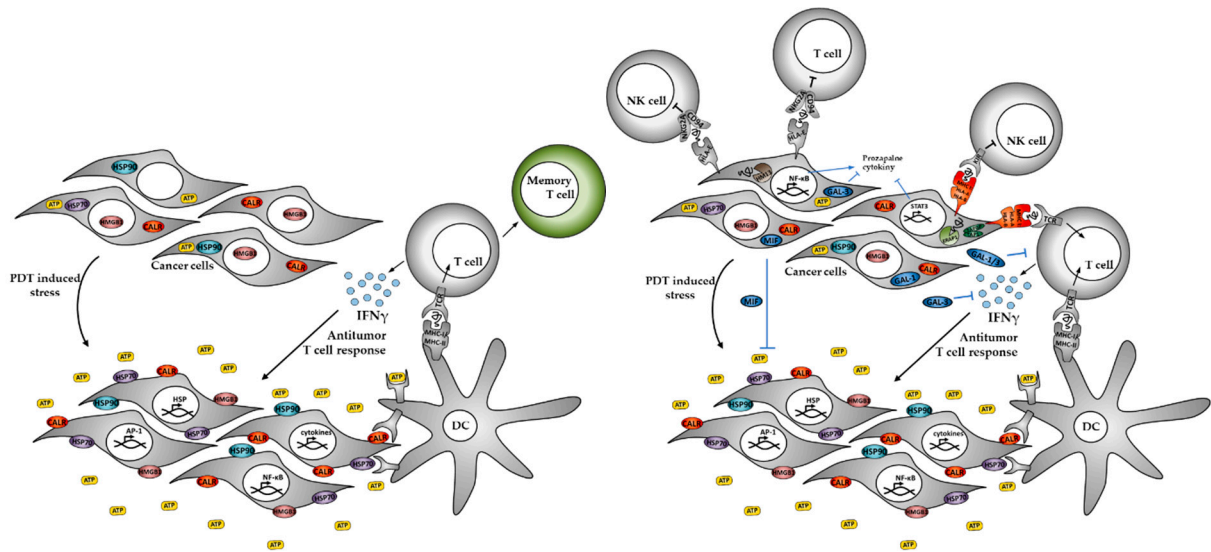

**Figure S1** Immunogenic cell death and resistance to PDT. (a) Immunogenic cell death induced by certain anti-cancer therapies, including PDT, due to stress and exposure/release of DAMP (e.g., CALR, ATP, HMGB1, HSP90, HSP70, tumor-derived nucleic acids), where the immune system is activated and triggers immunity against dead-cell antigens [18-22]. (b) Effect of detected changes in PDT-resistant cells on the immune system. An increased number of proteins that can act as DAMP and molecules of MHC class I. An increased level of NF-κB, which may promote the initiation of an anti-tumor response while decreased level of proteins involved in the processing of antigens for MHC-I, increased amount of STAT3, MIF and galectins which may lead to the escape of cancer cells from immune system. Presentation of antigens by HLA-E is also important for the antitumor response.

### *Changes in the level of proteins involved in antioxidant defense*

**Table S13.** Changes in the level of proteins involved in antioxidant defense in resistant CAL-39 cells.

|                     |                                                        | Gen      | T-Test    | CR:CS      |
|---------------------|--------------------------------------------------------|----------|-----------|------------|
| Antioxidant defense | Glutathione S-transferases                             | GSTO1    | < 0,00010 | Only in CR |
|                     |                                                        | MGST2    | < 0,00010 | Only in CS |
|                     | Antioxidant and detoxification activity                | TST      | 0,035     | Only in CR |
|                     |                                                        | FAM213A  | 0,045     | 0,3        |
|                     | Protection against oxidative stress-induced cell-death | SLC25A24 | 0,0051    | 3,3        |
|                     |                                                        | TPT1     | 0,034     | 2,2        |
|                     | Degradation of oxidatively damaged polypeptides        | LONP1    | 0,026     | 2,9        |
|                     | Thiol-specific peroxidases                             | PRDX3    | 0,011     | 3          |
|                     |                                                        | PRDX4    | 0,0071    | 2,7        |
|                     |                                                        | PRDX6    | 0,013     | 2,4        |
|                     | Thioredoxin                                            | TXN      | 0,00095   | 0,3        |

### *Changes in the level of proteins involved in cellular transport*

**Table S14.** Changes in the level of proteins involved in vesicular transport in resistant CAL-39 cells.

|                     |                                     | Gen                | T-Test    | CR:CS      |
|---------------------|-------------------------------------|--------------------|-----------|------------|
| Vesicular transport | RAB activity regulation             | GDI1               | < 0,00010 | Only in CR |
|                     |                                     | GDI2               | 0,0048    | 30         |
|                     | Endocytosis                         | Clathrin-dependent | SCAMP1    | 0,00014    |
|                     |                                     |                    | CLTA      | 0,008      |
|                     |                                     | Caveolae           | CAVIN3    | 0,0002     |
|                     |                                     |                    | CAV1      | 0,00079    |
|                     |                                     |                    | RAB5C     | 0,01       |
|                     | Recycling of transmembrane proteins | TXLNA              | 0,024     | Only in CR |
|                     |                                     | VPS26A             | 0,021     | Only in CR |
|                     |                                     | VPS35              | 0,035     | 13         |
|                     | multivesicular bodies (MVB)         | PDCD6IP            | 0,014     | Only in CR |
|                     |                                     | CHMP4B             | 0,014     | 8,8        |
|                     | Exocytosis                          | MAGEA4             | < 0,00010 | 32         |
|                     |                                     | MVP                | 0,039     | 16         |
|                     |                                     | CHP1               | 0,0046    | 0,09       |
|                     | From ER to Golgi complex            | SEC24C             | 0,00097   | Only in CR |
|                     |                                     | SEC31A             | 0,0059    | 4          |
|                     |                                     | TMED5              | 0,029     | 0,2        |
|                     | MPR transport                       | PLIN3              | 0,0018    | 45         |
|                     | Intracellular nanovesicles (INV)    | TPD52L2            | 0,026     | 2,5        |
|                     | Microtubule based movement          | KTN1               | 0,0046    | 0,5        |
|                     | From Golgi apparatus to ER          | RAB6A              | 0,027     | 0,3        |
|                     | Nuclear transport                   | IPO5               | 0,033     | Only in CR |
|                     |                                     | NUP205             | 0,035     | Only in CR |
|                     |                                     | XPO1               | 0,037     | 7          |
|                     |                                     | RCC1               | 0,0084    | 0,05       |

*Changes in the level of proteins involved in RNA processing*

**Table S15.** Changes in the level of proteins involved in RNA processing in resistant CAL-39 cells.

|                | Gen      | T-Test    | CR:CS      |
|----------------|----------|-----------|------------|
| RNA processing | SSB      | < 0,00010 | Only in CR |
|                | EDC4     | 0,0056    | Only in CR |
|                | CCDC12   | 0,019     | Only in CR |
|                | NSUN2    | 0,033     | Only in CR |
|                | DNAJC8   | 0,038     | Only in CR |
|                | HSPA2    | 0,017     | 5          |
|                | EFTUD2   | 0,0046    | 3,6        |
|                | DDX17    | 0,032     | 1,5        |
|                | SYNCRIP  | 0,013     | 0,5        |
|                | HNRNPD   | 0,036     | 0,5        |
|                | HNRNPA1  | 0,0019    | 0,4        |
|                | THOC6    | 0,032     | 0,4        |
|                | FBL      | 0,0042    | 0,4        |
|                | FBLL1    | 0,02      | 0,3        |
|                | SNRPB    | 0,046     | 0,1        |
|                | HNRNPUL1 | 0,014     | 0,1        |
|                | CHTOP    | 0,00023   | 0,08       |

|  |         |        |            |
|--|---------|--------|------------|
|  | HNRNPDL | 0,0051 | 0,04       |
|  | SRSF9   | 0,021  | Only in CS |

**Table S16.** Changes in the level of proteins involved in RNA processing in resistant A-431 cells.

|                | Gen         | T-Test | AR:AS      |
|----------------|-------------|--------|------------|
| RNA processing | PPAN-P2RY11 | 0,0036 | Only in AR |
|                | SF3A2       | 0,05   | Only in AR |
|                | MBNL1       | 0,019  | 5,9        |
|                | PA2G4       | 0,039  | 4          |
|                | SNU13       | 0,035  | 2,4        |
|                | MAGOHB      | 0,021  | 2,1        |
|                | SNRPE       | 0,023  | 0,6        |
|                | NONO        | 0,035  | 0,5        |
|                | PCBP1       | 0,028  | 0,4        |
|                | SNRPC       | 0,018  | 0,2        |
|                | DDX1        | 0,05   | 0,2        |
|                | HNRNPK      | 0,0026 | Only in AS |

### Mitochondrial respiration comparison in A-431 resistant and sensitive cell

#### Changes in the level of proteins involved in formation and regulation of cytoskeleton

As changes in the level of proteins involved in metabolism in A-431 cells were not as clear as in CAL-39 cell lines, comparison of mitochondrial respiration was performed on whole sensitive and resistant cells of A-431 cells with the use of Oroboros. Resistant A-431 cells showed an increase in basal respiration, O<sub>2</sub> consumption for ATP production, and maximum respiration capacity.

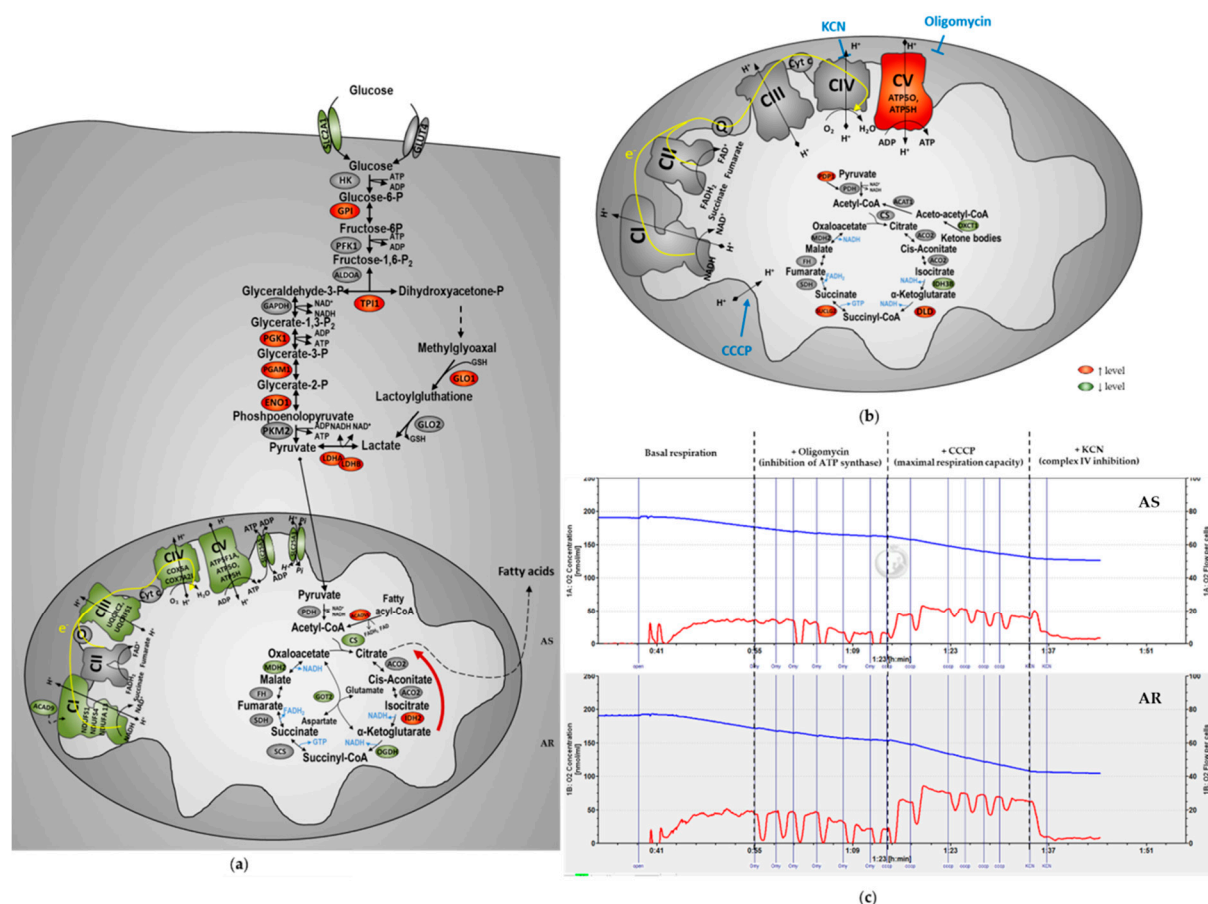

**Figure S2.** Mitochondrial respiration (a) Warburg effect in resistant CAL-39 cells. Despite the reduced amount of

the constitutive glucose transporter 1 (SLC2A1), these cells elevated level of proteins that may lead to increased glucose uptake (LANCL2 [16], NUCKS1 [23,24], PRKC $\iota$  [25], 14-3-3 [26]), e.g., as a result of activation of signaling pathways leading to GLUT4 transport to the cell membrane. These cells also had increased level of glycolytic pathway enzymes and decreased level of oxidative phosphorylation enzymes; (b) changes in resistant A-431 cells and mechanism of action of CCCP, oligomycin and KCN. Resistant A-431 cells were characterized by a higher level of mitochondria and enzymes involved in aerobic respiration; (c) comparison of mitochondrial respiration in sensitive and resistant A-431 cells. Resistant cells characterize a higher basal respiration, O<sub>2</sub> consumption to ATP production and maximal respiratory capacity.

## References:

1. Ruggieri, V.; Agriesti, F.; Tataranni, T.; Perris, R.; Mangieri, D. Paving the Path for Invasion: The Polyedric Role of LASP1 in Cancer. *Tumour Biol.* **2017**, *39*, 1–6, doi:10.1177/1010428317705757.
2. Butt, E.; Raman, D. New Frontiers for the Cytoskeletal Protein LASP1. *Frontiers in Oncology* **2018**, *8*, 1–11.
3. Zhang, X.; Liu, Y.; Fan, C.; Wang, L.; Li, A.; Zhou, H.; Cai, L.; Miao, Y.; Li, Q.; Qiu, X.; et al. Lasp1 Promotes Malignant Phenotype of Non-Small-Cell Lung Cancer via Inducing Phosphorylation of FAK-AKT Pathway. *Oncotarget* **2017**, *8*, 75102–75113, doi:10.18632/oncotarget.20527.
4. Li, M.; Jin, C.; Xu, M.; Zhou, L.; Li, D.; Yin, Y. Bifunctional Enzyme ATIC Promotes Propagation of Hepatocellular Carcinoma by Regulating AMPK-MTOR-S6 K1 Signaling. *Cell Commun Signal* **2017**, *15*, 52–52, doi:10.1186/s12964-017-0208-8.
5. Shi, Z.; Zhang, J.; Zheng, S. What We Know about ST13, a Co-Factor of Heat Shock Protein, or a Tumor Suppressor? *J Zhejiang Univ Sci B* **2007**, *8*, 170–176, doi:10.1631/jzus.2007.B0170.
6. Májek, P.; Reicheltová, Z.; Štikarová, J.; Suttner, J.; Sobotková, A.; Dyr, J.E. Proteome Changes in Platelets Activated by Arachidonic Acid, Collagen, and Thrombin. *Proteome Sci* **2010**, *8*, 1–13, doi:10.1186/1477-5956-8-56.
7. Xiao, H.; Zhou, B.; Jiang, N.; Cai, Y.; Liu, X.; Shi, Z.; Li, M.; Du, C. The Potential Value of CDV3 in the Prognosis Evaluation in Hepatocellular Carcinoma. *Genes & Diseases* **2018**, *5*, 167–171, doi:10.1016/j.gendis.2018.01.003.
8. Kochan, G.; Escors, D.; Breckpot, K.; Guerrero-Setas, D. Role of Non-Classical MHC Class I Molecules in Cancer Immunosuppression. *OncoImmunology* **2013**, *2*, e26491-1–8, doi:10.4161/onci.26491.
9. Zheng, H.-C. The Molecular Mechanisms of Chemoresistance in Cancers. *Oncotarget* **2017**, *8*, 59950–59964, doi:10.18632/oncotarget.19048.
10. Chen, C.; Zhao, S.; Karnad, A.; Freeman, J.W. The Biology and Role of CD44 in Cancer Progression: Therapeutic Implications. *Journal of Hematology & Oncology* **2018**, *11*, 1–23, doi:10.1186/s13045-018-0605-5.
11. Toole, B.P. Hyaluronan-CD44 Interactions in Cancer: Paradoxes and Possibilities. *Clin Cancer Res* **2009**, *15*, 7462–7468, doi:10.1158/1078-0432.CCR-09-0479.
12. Xu, H.; Tian, Y.; Yuan, X.; Wu, H.; Liu, Q.; Pestell, R.; Wu, K. The Role of CD44 in Epithelial–Mesenchymal Transition and Cancer Development. *OTT* **2015**, *8*, 3783–3792, doi:10.2147/OTT.S95470.
13. Manara, M.; Cristina, Pasello, M.; Scotlandi, K. CD99: A Cell Surface Protein with an Oncojanus Role in Tumors. *Genes* **2018**, *9*, 1–17, doi:10.3390/genes9030159.
14. Zhou, H.; Rigoutsos, I. The Emerging Roles of GPRC5A in Diseases. *Oncoscience* **2014**, *1*, 765–776, doi:10.18632/oncoscience.104.
15. Jiang, X.; Xu, X.; Wu, M.; Guan, Z.; Su, X.; Chen, S.; Wang, H.; Teng, L. GPRC5A: An Emerging Biomarker in Human Cancer. *BioMed Research International* **2018**, *2018*, 1–11, doi:10.1155/2018/1823726.
16. Zocchi, E.; Hontecillas, R.; Leber, A.; Einerhand, A.; Carbo, A.; Bruzzzone, S.; Tubau-Juni, N.; Philipson, N.; Zoccoli-Rodriguez, V.; Sturla, L.; et al. Absciscic Acid: A Novel Nutraceutical for Glycemic Control. *Front. Nutr.* **2017**, *4*, 1–13, doi:10.3389/fnut.2017.00024.
17. Zhu, C.; Wei, Y.; Wei, X. AXL Receptor Tyrosine Kinase as a Promising Anti-Cancer Approach: Functions, Molecular Mechanisms and Clinical Applications. *Mol Cancer* **2019**, *18*, 1–22, doi:10.1186/s12943-019-1090-3.
18. Agostinis, P.; Berg, K.; Cengel, K.A.; Foster, T.H.; Girotti, A.W.; Gollnick, S.O.; Hahn, S.M.; Hamblin, M.R.; Juzeniene, A.; Kessel, D.; et al. Photodynamic Therapy of Cancer: An Update. *CA: A Cancer Journal for Clinicians* **2011**, *61*, 250–281, doi:10.3322/caac.20114.
19. Galluzzi, L.; Vitale, I.; Aaronson, S.A.; Abrams, J.M.; Adam, D.; Agostinis, P.; Alnemri, E.S.; Altucci, L.; Amelio, I.; Andrews, D.W.; et al. Molecular Mechanisms of Cell Death: Recommendations of the

Nomenclature Committee on Cell Death 2018. *Cell Death Differ* **2018**, 25, 486–541, doi:10.1038/s41418-017-0012-4.

20. Krysko, D.V.; Garg, A.D.; Kaczmarek, A.; Krysko, O.; Agostinis, P.; Vandenabeele, P. Immunogenic Cell Death and DAMPs in Cancer Therapy. *Nat Rev Cancer* **2012**, 12, 860–875, doi:10.1038/nrc3380.
21. Tang, D.; Kang, R.; Berghe, T.V.; Vandenabeele, P.; Kroemer, G. The Molecular Machinery of Regulated Cell Death. *Cell Res* **2019**, 29, 347–364, doi:10.1038/s41422-019-0164-5.
22. van Straten, D.; Mashayekhi, V.; de Bruijn, H.; Oliveira, S.; Robinson, D. Oncologic Photodynamic Therapy: Basic Principles, Current Clinical Status and Future Directions. *Cancers* **2017**, 9, 1–54, doi:10.3390/cancers9020019.
23. Huang, P.; Cai, Y.; Zhao, B.; Cui, L. Roles of NUCKS1 in Diseases: Susceptibility, Potential Biomarker, and Regulatory Mechanisms. *BioMed Research International* **2018**, 2018, 1–7, doi:10.1155/2018/7969068.
24. Chang, L.; Chiang, S.-H.; Saltiel, A.R. Insulin Signaling and the Regulation of Glucose Transport. *Mol Med* **2004**, 10, 65–71, doi:10.2119/2005-00029.Saltiel.
25. Nomiya, R.; Emoto, M.; Fukuda, N.; Matsui, K.; Kondo, M.; Sakane, A.; Sasaki, T.; Tanizawa, Y. Protein Kinase C Iota Facilitates Insulin-induced Glucose Transport by Phosphorylation of Soluble NSF Attachment Protein Receptor Regulator (SNARE) Double C2 Domain Protein b. *J Diabetes Investig* **2019**, 10, 591–601, doi:10.1111/jdi.12965.
26. Pennington, K.; Chan, T.; Torres, M.; Andersen, J. The Dynamic and Stress-Adaptive Signaling Hub of 14-3-3: Emerging Mechanisms of Regulation and Context-Dependent Protein–Protein Interactions. *Oncogene* **2018**, 37, 5587–5604, doi:10.1038/s41388-018-0348-3.
27. Mossakowska, B.J.; Shahmoradi Ghahe, S.; Cysewski, D.; Fabisiwicz, A.; Tudek, B.; Siedlecki, J.A. Mechanisms of Resistance to Photodynamic Therapy (PDT) in Vulvar Cancer. *IJMS* **2022**, 23, 4117, doi:10.3390/ijms23084117.
